# Supplementary material
Source: publisher figshare collection journal article supplement (https://frontiersin.figshare.com/ndownloader/files/25141532)
Supplement: Supplementary file [file 25141532]

**Supplemental Material for:**

**Enzyme kinetics by isothermal titration calorimetry: allostery,  
inhibition, and dynamics**

**Yun Wang<sup>1</sup>, Guanyu Wang<sup>1</sup>, Nicolas Moitessier<sup>1</sup>, Anthony Mittermaier<sup>1</sup>**

<sup>1</sup>Department of Chemistry, McGill University, Montreal, Quebec, Canada

**Supplementary Table 1. ITC Enzyme Kinetics Publications**

| Enzyme Class       | Reaction                         | Enzyme                                | Organism                          | Reference | Advantage of ITC                                                                                                              | Method                                                                  |
|--------------------|----------------------------------|---------------------------------------|-----------------------------------|-----------|-------------------------------------------------------------------------------------------------------------------------------|-------------------------------------------------------------------------|
| <b>Hydrolase</b>   |                                  |                                       |                                   |           |                                                                                                                               |                                                                         |
| <b>Esterase</b>    | hydrolysis of ester bond         | Phosphotriesterase (OpdA)             | <i>Agrobacterium radiobacter</i>  | (1)       | Traditional uses chromogenic Modified substrate.                                                                              | Multiple injection; Single substrate injection; Single enzyme injection |
|                    |                                  | Glycerophosphodiesterase (GpdQ)       | <i>Enterobacter aerogenes</i>     | (1)       | Same as above                                                                                                                 | Multiple injection; Single substrate injection                          |
|                    |                                  | Cyclic nucleotide diesterase (Rv0805) | <i>Mycobacterium tuberculosis</i> | (1)       | Same above                                                                                                                    | Multiple injection; Single substrate injection                          |
|                    |                                  | Phosphodiesterase (PDE1)              | <i>Bos taurus</i>                 | (2,3)     |                                                                                                                               | Multiple injection                                                      |
|                    |                                  | alkaline phosphatase                  | <i>Bos taurus</i>                 | (4)       |                                                                                                                               | others                                                                  |
|                    |                                  | RNases (ribonucleases)                | <i>Bos taurus</i>                 | (5,6)     |                                                                                                                               | Single substrate injection; Modified single substrate injection         |
|                    |                                  | Acetylcholinesterase (AChE)           | <i>Electrophorus electricus</i>   | (7,8)     | Neither the product nor substrate of AChE are suitable for direct spectrophotometric evaluation.                              | Multiple injection; Single substrate injection                          |
|                    |                                  | sulfatases                            | <i>Patella vulgate</i>            | (4)       |                                                                                                                               | others                                                                  |
| <b>Glycosylase</b> | hydrolysis of glycosyl compounds | Pullulanase                           | <i>Klebsiella pneumoniae</i>      | (9-11)    | Entangled alginate medium and immobilized, insoluble support matrix.                                                          | Single enzyme injection                                                 |
|                    |                                  | exo-polygalacturonases (PGs)          | <i>Rhizopus oryzae</i>            | (12)      | The using of reducing sugar s (e.g. dinitrosalicylic acid, Somogyi–Nelson) may overestimate or underestimate reducing sugars. | Multiple injection; Single substrate injection                          |
|                    |                                  | nucleoside hydrolase (MtiAGU-NH)      | <i>Mycobacterium tuberculosis</i> | (13)      |                                                                                                                               | Single enzyme injection                                                 |

|  |  |                           |                                                                                            |         |                                                                                                                                                                                 |                                                   |
|--|--|---------------------------|--------------------------------------------------------------------------------------------|---------|---------------------------------------------------------------------------------------------------------------------------------------------------------------------------------|---------------------------------------------------|
|  |  | $\alpha$ -Amylase         | <i>Drosophila melanogaster</i> ;<br><i>Homo sapiens</i> ;<br><i>Sus scrofa</i>             | (14-16) | Conventional $\alpha$ -Amylase activity s use a Modified substrate (e.g. chromophore-containing (CNP) maltoheptaose), which may influence the binding and catalysis mechanisms. | Single enzyme injection                           |
|  |  | sialidase                 | <i>Arthrobacter ureafaciens</i>                                                            | (17)    |                                                                                                                                                                                 | Multiple injection                                |
|  |  | Invertase                 | <i>Saccharomyces cerevisiae</i>                                                            | (18)    | Membrane immobilized enzyme.                                                                                                                                                    | Modified single substrate injection               |
|  |  | Chitinases                | <i>Arthrobacter sp. TAD20</i> ; <i>Serratia marcescens</i> ;<br><i>Serratia marcescens</i> | (19,20) | Insoluble substrate.                                                                                                                                                            | Single enzyme injection                           |
|  |  | $\beta$ -glucosidase (BG) | <i>Pyrococcus furiosus</i> ;<br><i>Thermobifida fusca</i> ; <i>Prunis dulcus</i>           | (21-23) | Immobilized enzyme.                                                                                                                                                             | Multiple injection;<br>Single substrate injection |
|  |  | xylanase                  | <i>Aspergillus aculeatus</i>                                                               | (24)    | Chemical-reducing-end sugar s are not always reliable.                                                                                                                          | Multiple injection                                |
|  |  | endo-Glucanases (EGs)     | <i>Trichoderma reesei</i>                                                                  | (25)    | The conventional uses a Modified substrate.                                                                                                                                     | Single substrate injection                        |
|  |  | Cellulases                | <i>Hypocrea jecorina</i> ;<br><i>Trichoderma reesei</i> ;<br><i>Aspergillus niger</i> ;    | (26,27) | No alternative simple and quantitative to characterize a saccharification of cellulosic biomass.                                                                                | Single substrate injection                        |
|  |  | cellobiohydrolase (Cel6A) | <i>Hypocrea jecorina</i>                                                                   | (28)    | The use of chromogenic substrates or modified oligosaccharides do not reflect the enzymatic activity of complex substrates. ITC uses a native substrate (e.g. soluble,          | Multiple injection;<br>Single substrate injection |

|                                  |                                          |                                                             |                                                                           |         |                                                                          |                                                                                                           |
|----------------------------------|------------------------------------------|-------------------------------------------------------------|---------------------------------------------------------------------------|---------|--------------------------------------------------------------------------|-----------------------------------------------------------------------------------------------------------|
|                                  |                                          |                                                             |                                                                           |         | insoluble and complex substrate).                                        |                                                                                                           |
| <b>Epoxide hydrolase</b>         | hydrolysis of trans-substituted epoxides | epoxide hydrolase (hsEH)                                    | <i>Homo sapiens</i>                                                       | (29)    | Conventional uses LC-MS/MS                                               | Single substrate injection;<br>Modified single substrate injection                                        |
| <b>Acid anhydride hydrolases</b> | hydrolysis of acid anhydride             | Nucleoside triphosphate diphosphohydrolases (NTPDases)      | <i>Rattus norvegicus</i>                                                  | (30)    |                                                                          | Multiple injection                                                                                        |
|                                  |                                          | Lupin Diadenosine 5',5-P1,P4-Tetraphosphate Hydrolase(Ap4A) | <i>Lupinus angustifolius</i>                                              | (31)    |                                                                          | Multiple injection;<br>Single substrate injection                                                         |
| <b>Proteases / Peptidases</b>    | Hydrolysis of peptide bonds              | Trypsin                                                     | <i>Bos Taurus</i>                                                         | (32-37) | Conventional real-time s use<br>Modified chromogenic substrates.         | Multiple injection;<br>Single substrate injection;<br>Modified single substrate injection<br>Others (ERM) |
|                                  |                                          | Nattokinase (NK)                                            | <i>Bacillus subtilis</i>                                                  | (38)    |                                                                          | Modified single substrate injection                                                                       |
|                                  |                                          | Prolyl carboxypeptidase (PRCP)                              | <i>Homo sapiens</i>                                                       | (39)    |                                                                          | Multiple injection                                                                                        |
|                                  |                                          | prolyl oligopeptidase (POP)                                 | <i>Homo sapiens</i>                                                       | (37,40) |                                                                          | Modified Multiple injection;<br>Single substrate injection;<br>Others (ERM)                               |
|                                  |                                          | Pepsin                                                      | <i>Sus scrofa</i>                                                         | (41)    |                                                                          | Multiple injection;<br>Single substrate injection                                                         |
|                                  |                                          | d,d-dipeptidase enzyme VanX                                 | <i>Enterococcus faecalis</i> ;<br><i>vancomycin-resistant Enterococci</i> | (42)    | Conventional uses capillary electrophoresis. In vivo application of ITC. | Single substrate injection                                                                                |

|                                     |                                    |                                                           |                                                                                                                                                                                |         |                                                                                               |                                                   |
|-------------------------------------|------------------------------------|-----------------------------------------------------------|--------------------------------------------------------------------------------------------------------------------------------------------------------------------------------|---------|-----------------------------------------------------------------------------------------------|---------------------------------------------------|
| <b>Amido-hydrolase</b>              | hydrolysis of amide or amine bonds | $\beta$ -lactamase                                        | <i>Halophile Chromohalobacter</i> sp. 560;<br><i>Pseudomonas aeruginosa</i> ;<br><i>Escherichia coli</i> ;<br><i>Staphylococcus aureus</i> ;<br><i>Acinetobacter baumannii</i> | (43-47) | In vivo ITC application.                                                                      | Multiple injection;<br>Single substrate injection |
|                                     |                                    | Urease                                                    | <i>Sporosarcina pasteurii</i>                                                                                                                                                  | (48,49) |                                                                                               | Multiple injection                                |
|                                     |                                    | Maleamate Amidohydrolase (NicF)                           | <i>Bordetella bronchiseptica</i>                                                                                                                                               | (50)    |                                                                                               | Multiple injection                                |
| <b>deaminase</b>                    | Removal of an amino group          | dCMP deaminase                                            | <i>Schistosoma mansoni</i>                                                                                                                                                     | (51)    |                                                                                               | Multiple injection                                |
| <b>Transferases</b>                 |                                    |                                                           |                                                                                                                                                                                |         |                                                                                               |                                                   |
| <b>Phospho-transferase (Kinase)</b> | transfer of phosphate groups       | Gluconokinase                                             | <i>Homo sapiens</i>                                                                                                                                                            | (52)    | Conventional uses coupled enzymes.                                                            | Multiple injection                                |
|                                     |                                    | Hexokinase (HK)                                           | <i>Saccharomyces cerevisiae</i>                                                                                                                                                | (53-55) | The use of labeled substrates caused a large variation of $K_m$ for glucose and fructose(56). | Multiple injection;<br>Single substrate injection |
|                                     |                                    | Arginine kinase                                           | <i>Litopenaeus vannamei</i>                                                                                                                                                    | (57)    |                                                                                               | Multiple injection                                |
|                                     |                                    | aminoglycoside 3'-phosphotransferase-IIIa (APH (3')-IIIa) | <i>Enterococcus faecalis</i>                                                                                                                                                   | (58)    | ITC allows real-time measurement of ADP interactions (unlike coupled )                        | Modified single substrate injection               |
|                                     |                                    | pantothenate kinases ( <i>EcPanK</i> , <i>PaPanK</i> )    | <i>Pseudomonas aeruginosa</i> ,<br><i>Escherichia coli</i>                                                                                                                     | (58)    | Same as above                                                                                 | Modified single substrate injection               |
|                                     |                                    | protein kinase C                                          | <i>Rattus norvegicus</i>                                                                                                                                                       | (59)    |                                                                                               | Modified single substrate injection               |
|                                     |                                    | pyruvate kinase                                           | <i>Oryctolagus Cuniculus</i>                                                                                                                                                   | (60,61) | Conventional uses coupled enzymes.                                                            | Single enzyme injection                           |
|                                     |                                    | Taurocyamine kinase (PsTK)                                | <i>Phytophthora sojae</i>                                                                                                                                                      | (62)    |                                                                                               | Multiple injection                                |

|                             |                                  |                                                            |                                   |         |                                                                                                                        |                                                   |
|-----------------------------|----------------------------------|------------------------------------------------------------|-----------------------------------|---------|------------------------------------------------------------------------------------------------------------------------|---------------------------------------------------|
| <b>Glycosyl-transferase</b> | formation of glycosidic linkages | glycogen phosphorylase (GP)                                | <i>Oryctolagus Cuniculus</i>      | (63)    | Custom-ITC based method directly monitored reaction kinetics in both glycogen synthesis and phosphorolysis directions. | Single enzyme injection                           |
|                             |                                  | Levansucrase (SacB)                                        | <i>Bacillus subtilis</i>          | (64)    |                                                                                                                        | Single substrate injection                        |
| <b>Oxidoreductases</b>      |                                  |                                                            |                                   |         |                                                                                                                        |                                                   |
|                             | redox reaction                   | versatile peroxidase (VP)                                  | <i>Bjerkandera adusta</i>         | (65,66) | Complex humic substances substrates.                                                                                   | Single substrate injection                        |
|                             |                                  | Putrescine oxidase (PUO)                                   | <i>Micrococcus rubens</i>         | (67)    | Immobilized enzyme                                                                                                     | Single substrate injection                        |
|                             |                                  | dihydrofolate reductase (DHFR)                             | <i>Schistosoma mansoni</i>        | (68)    |                                                                                                                        | Multiple injection                                |
|                             |                                  | recombinant human flavincontaining monooxygenase 3 (hFMO3) | <i>Homo sapiens</i>               | (69)    |                                                                                                                        | Multiple injection;<br>Single substrate injection |
|                             |                                  | diaphorase                                                 | <i>Clostridium kluyveri</i>       | (4)     |                                                                                                                        | others                                            |
|                             |                                  | laccase                                                    | <i>Trametes versicolor</i>        | (4)     |                                                                                                                        | others                                            |
|                             |                                  | phenylalanine hydroxylase (PHA)                            | <i>Homo sapiens</i>               | (70)    |                                                                                                                        | Multiple injection;<br>Single enzyme injection    |
|                             |                                  | dihydroorotate dehydrogenase (TcDHODH)                     | <i>Trypanosoma cruzi</i>          | (71)    | ITC employs native substrate.                                                                                          | Multiple injection                                |
| <b>Lyase</b>                |                                  |                                                            |                                   |         |                                                                                                                        |                                                   |
|                             | elimination reaction             | Adenylosuccinate lyase (SmADSL)                            | <i>Schistosoma mansoni</i>        | (72)    |                                                                                                                        | Multiple injection                                |
|                             |                                  | Acetolactate synthase                                      | <i>unknown</i>                    | (55)    |                                                                                                                        | Multiple injection                                |
|                             |                                  | Heparin lyase                                              | <i>Flavobacterium . heparinum</i> | (55)    |                                                                                                                        | Multiple injection                                |
|                             |                                  | Rubisco                                                    | <i>Rhodospirillum . rubrum</i>    | (55)    |                                                                                                                        | Multiple injection                                |
| <b>Ligases</b>              |                                  |                                                            |                                   |         |                                                                                                                        |                                                   |

|                   |                                 |                      |                           |      |  |                    |
|-------------------|---------------------------------|----------------------|---------------------------|------|--|--------------------|
|                   | Covalently links two substrates | CTP synthase         | <i>Lactococcus lactis</i> | (73) |  | Multiple injection |
|                   |                                 | pyruvate carboxylase | <i>Bos taurus</i>         | (55) |  | Multiple injection |
| <b>Isomerases</b> |                                 |                      |                           |      |  |                    |
|                   |                                 | Chaperonin GroEL     | <i>Escherichia coli</i>   | (55) |  | Multiple injection |

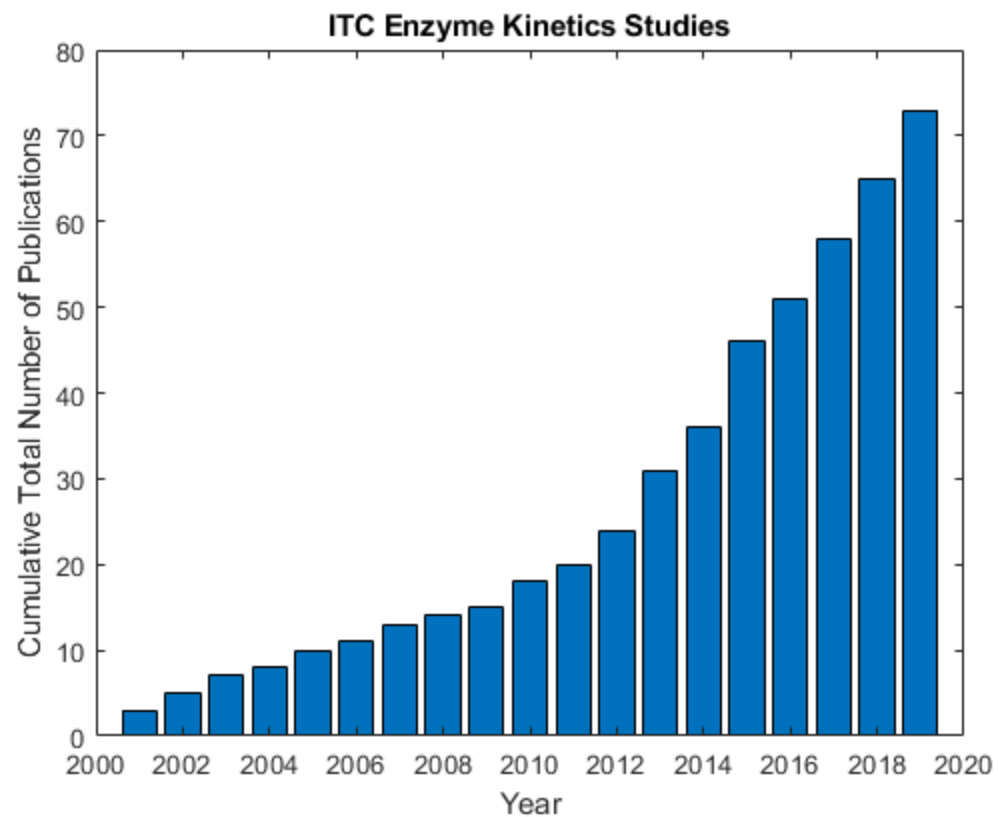

**Supplemental Figure 1. Cumulative graph of ITC enzyme kinetics studies by year.**

#### **References.**

1. Pedroso, M.M., Ely, F., Lonhienne, T., Gahan, L.R., Ollis, D.L., Guddat, L.W. and Schenk, G. (2014) Determination of the catalytic activity of binuclear metallohydrolases using isothermal titration calorimetry. *JBIC Journal of Biological Inorganic Chemistry*, **19**, 389-398.
2. Brulfert, F., Safi, S., Jeanson, A., Foerstendorf, H., Weiss, S., Berthomieu, C., Sauge-Merle, S. and Simoni, É. (2017) Enzymatic activity of the CaM-PDE1 system upon addition of actinyl ions. *Journal of Inorganic Biochemistry*, **172**, 46-54.



3. Stateva, S., Salas, V., Benaim, G., Menendez, M., Solís, D. and Villalobo, A. (2015) Characterization of Phospho-(Tyrosine)-Mimetic Calmodulin Mutants. *PLoS one*, **10**, e0120798.
4. Honarmand Ebrahimi, K., Hagedoorn, P.-L., Jacobs, D. and Hagen, W.R. (2015) Accurate label-free reaction kinetics determination using initial rate heat measurements. *Scientific Reports*, **5**, 16380.
5. Spencer, S.D. and Raffa, R.B. (2004) Isothermal Titration Calorimetric Study of RNase-A Kinetics (cCMP  $\rightarrow$  3'-CMP) Involving End-Product Inhibition. *Pharmaceutical Research*, **21**, 1642-1647.
6. Cai, L., Cao, A. and Lai, L. (2001) An Isothermal Titration Calorimetric Method to Determine the Kinetic Parameters of Enzyme Catalytic Reaction by Employing the Product Inhibition as Probe. *Anal. Biochem.*, **299**, 19-23.
7. de Almeida Neves, P.A., Silva, E. and Beirão, P. (2017) Microcalorimetric Study of Acetylcholine and Acetylthiocholine Hydrolysis by Acetylcholinesterase. *Advances in Enzyme Research*, **2017**, 1-12.
8. Draczkowski, P., Tomaszuk, A., Halczuk, P., Strzemiński, M., Matosiuk, D. and Jozwiak, K. (2016) Determination of affinity and efficacy of acetylcholinesterase inhibitors using isothermal titration calorimetry. *Biochimica et Biophysica Acta (BBA) - General Subjects*, **1860**, 967-974.
9. Ali, G., Dulong, V., Gasmi, S.N., Rihouey, C., Picton, L. and Le Cerf, D. (2015) Covalent immobilization of pullulanase on alginate and study of its hydrolysis of pullulan. *Biotechnology Progress*, **31**, 883-889.
10. Ali, G., Rihouey, C., Le Cerf, D. and Picton, L. (2013) Effect of carboxymethyl groups on degradation of Modified pullulan by pullulanase from *Klebsiella pneumoniae*. *Carbohydrate Polymers*, **93**, 109-115.
11. Ali, G., Rihouey, C., Larreta-Garde, V., Le Cerf, D. and Picton, L. (2013) Molecular Size Characterization and Kinetics Studies on Hydrolysis of Pullulan by Pullulanase in an Entangled Alginate Medium. *Biomacromolecules*, **14**, 2234-2241.
12. Mertens, J.A. (2013) Kinetic Properties of Two *Rhizopus* Exo-polygalacturonase Enzymes Hydrolyzing Galacturonic Acid Oligomers Using Isothermal Titration Calorimetry. *Applied Biochemistry and Biotechnology*, **170**, 2009-2020.
13. Wink, P.L., Sanchez Quitian, Z.A., Rosado, L.A., Rodrigues, V.d.S., Petersen, G.O., Lorenzini, D.M., Lipinski-Paes, T., Saraiva Macedo Timmers, L.F., de Souza, O.N., Basso, L.A. *et al.* (2013) Biochemical characterization of recombinant nucleoside hydrolase from *Mycobacterium tuberculosis* H37Rv. *Archives of Biochemistry and Biophysics*, **538**, 80-94.
14. Kaeswurm, J.A.H., Claasen, B., Fischer, M.-P. and Buchweitz, M. (2019) Interaction of Structurally Diverse Phenolic Compounds with Porcine Pancreatic  $\alpha$ -Amylase. *Journal of Agricultural and Food Chemistry*, **67**, 11108-11118.
15. Lehocski, G., Szabó, K., Takács, I., Kandra, L. and Gyémánt, G. (2016) Simple ITC method for activity and inhibition studies on human salivary  $\alpha$ -amylase. *Journal of Enzyme Inhibition and Medicinal Chemistry*, **31**, 1648-1653.
16. Commin, C., Aumont-Nicaise, M., Claisse, G., Feller, G. and Da Lage, J.-L. (2013) Enzymatic characterization of recombinant  $\alpha$ -amylase in the *Drosophila melanogaster* species subgroup: is there an effect of specialization on digestive enzyme? *Genes Genet. Syst.*, **88**, 251-259.
17. Chen, C.-S. and Lee, W.-J. (2018) Study of the Enzymatic Activity of *Arthrobacter ureafaciens* Neuraminidase by Isothermal Titration Calorimetry. *Journal of the Chinese Chemical Society*, **65**, 271-275.
18. Mason, M., Scampicchio, M., Quinn, C.F., Transtrum, M.K., Baker, N., Hansen, L.D. and Kenealey, J.D. (2018) Calorimetric Methods for Measuring Stability and Reusability of Membrane Immobilized Enzymes. *Journal of Food Science*, **83**, 326-331.

19. Lonhienne, T., Baise, E., Feller, G., Bouriotis, V. and Gerday, C. (2001) Enzyme activity determination on macromolecular substrates by isothermal titration calorimetry: application to mesophilic and psychrophilic chitinases. *Biochimica et Biophysica Acta (BBA) - Protein Structure and Molecular Enzymology*, **1545**, 349-356.
20. Krokeide, I.-M., Eijsink, V.G.H. and Sørli, M. (2007) Enzyme for chitinase catalyzed hydrolysis of tetra-N-acetylchitotetraose by isothermal titration calorimetry. *Thermochimica Acta*, **454**, 144-146.
21. Park, S.H., Park, K.H., Oh, B.C., Alli, I. and Lee, B.H. (2011) Expression and characterization of an extremely thermostable  $\beta$ -glycosidase (mannosidase) from the hyperthermophilic archaeon *Pyrococcus furiosus* DSM3638. *New Biotechnology*, **28**, 639-648.
22. Jeoh, T., Baker, J.O., Ali, M.K., Himmel, M.E. and Adney, W.S. (2005)  $\beta$ -d-Glucosidase reaction kinetics from isothermal titration microcalorimetry. *Analytical Biochemistry*, **347**, 244-253.
23. Henzler, K., Haupt, B. and Ballauff, M. (2008) Enzymatic activity of immobilized enzyme determined by isothermal titration calorimetry. *Analytical Biochemistry*, **378**, 184-189.
24. Baumann, M.J., Murphy, L., Lei, N., Krogh, K.B.R.M., Borch, K. and Westh, P. (2011) Advantages of isothermal titration calorimetry for xylanase kinetics in comparison to chemical-reducing-end s. *Analytical Biochemistry*, **410**, 19-26.
25. Murphy, L., Cruys-Bagger, N., Damgaard, H.D., Baumann, M.J., Olsen, S.N., Borch, K., Lassen, S.F., Sweeney, M., Tatsumi, H. and Westh, P. (2012) Origin of initial burst in activity for *Trichoderma reesei* endo-glucanases hydrolyzing insoluble cellulose. *J. Biol. Chem.*, **287**, 1252-1260.
26. Murphy, L., Bohlin, C., Baumann, M.J., Olsen, S.N., Sørensen, T.H., Anderson, L., Borch, K. and Westh, P. (2013) Product inhibition of five *Hypocrea jecorina* cellulases. *Enzyme and Microbial Technology*, **52**, 163-169.
27. Murphy, L., Borch, K., McFarland, K.C., Bohlin, C. and Westh, P. (2010) A calorimetric for enzymatic saccharification of biomass. *Enzyme and Microbial Technology*, **46**, 141-146.
28. Murphy, L., Baumann, M.J., Borch, K., Sweeney, M. and Westh, P. (2010) An enzymatic signal amplification system for calorimetric studies of cellobiohydrolases. *Analytical Biochemistry*, **404**, 140-148.
29. Abis, G., Pacheco-Gómez, R., Bui, T.T.T. and Conte, M.R. (2019) Isothermal Titration Calorimetry Enables Rapid Characterization of Enzyme Kinetics and Inhibition for the Human Soluble Epoxide Hydrolase. *Analytical Chemistry*, **91**, 14865-14872.
30. Zebisch, M., Krauss, M., Schäfer, P. and Sträter, N. (2012) Crystallographic Evidence for a Domain Motion in Rat Nucleoside Triphosphate Diphosphohydrolase (NTPDase) 1. *Journal of Molecular Biology*, **415**, 288-306.
31. Branson, K.M., Mertens, H.D.T., Swarbrick, J.D., Fletcher, J.I., Kedzierski, L., Gayler, K.R., Gooley, P.R. and Smith, B.J. (2009) Discovery of Inhibitors of Lupin Diadenosine 5' ,5' ' ' -P<sub>1</sub>,P<sub>4</sub>-Tetraphosphate Hydrolase by Virtual Screening. *Biochemistry*, **48**, 7614-7620.
32. Maximova, K., Wojtczak, J. and Trylska, J. (2019) Enzyme kinetics in crowded solutions from isothermal titration calorimetry. *Analytical Biochemistry*, **567**, 96-105.
33. Di Trani, J.M., Moitessier, N. and Mittermaier, A.K. (2018) Complete Kinetic Characterization of Enzyme Inhibition in a Single Isothermal Titration Calorimetric Experiment. *Anal. Chem. (Washington, DC, U. S.)*, **90**, 8430-8435.
34. Transtrum, M.K., Hansen, L.D. and Quinn, C. (2015) Enzyme kinetics determined by single-injection isothermal titration calorimetry. *Methods*, **76**, 194-200.

35. Maximova, K. and Trylska, J. (2015) Kinetics of trypsin-catalyzed hydrolysis determined by isothermal titration calorimetry. *Analytical Biochemistry*, **486**, 24-34.
36. Aguirre, C., Condado-Morales, I., Olguin, L.F. and Costas, M. (2015) Isothermal titration calorimetry determination of individual rate constants of trypsin catalytic activity. *Analytical Biochemistry*, **479**, 18-27.
37. Di Trani, J.M., Moitessier, N. and Mittermaier, A.K. (2017) Measuring Rapid Time-Scale Reaction Kinetics Using Isothermal Titration Calorimetry. *Analytical Chemistry*, **89**, 7022-7030.
38. Weng, M., Deng, X., Bao, W., Zhu, L., Wu, J., Cai, Y., Jia, Y., Zheng, Z. and Zou, G. (2015) Improving the activity of the subtilisin nattokinase by site-directed mutagenesis and molecular dynamics simulation. *Biochemical and Biophysical Research Communications*, **465**, 580-586.
39. Kehoe, K., Van Elzen, R., Verkerk, R., Sim, Y., Van der Veken, P., Lambeir, A.-M. and De Meester, I. (2016) Prolyl carboxypeptidase purified from human placenta: its characterization and identification as an apelin-cleaving enzyme. *Biochimica et Biophysica Acta (BBA) - Proteins and Proteomics*, **1864**, 1481-1488.
40. Di, T.J.M., De, C.S., O'Leary, R., Plescia, J., do, N.C.J., Moitessier, N., Mittermaier, A.K. and do, N.C.J. (2018) Rapid measurement of inhibitor binding kinetics by isothermal titration calorimetry. *Nat Commun*, **9**, 893.
41. Luo, Q., Chen, D., Boom, R.M. and Janssen, A.E.M. (2018) Revisiting the enzymatic kinetics of pepsin using isothermal titration calorimetry. *Food Chemistry*, **268**, 94-100.
42. Lv, M., Zhang, Y.-J., Zhou, F., Ge, Y., Zhao, M.-H., Liu, Y. and Yang, K.-W. (2019) Real-time monitoring of D-Ala-D-Ala dipeptidase activity of VanX in living bacteria by isothermal titration calorimetry. *Analytical Biochemistry*, **578**, 29-35.
43. Antunes, V.U., Llontop, E.E., Vasconcelos, F.N.d.C., Lopez de los Santos, Y., Oliveira, R.J., Lincopan, N., Farah, C.S., Doucet, N., Mittermaier, A. and Favaro, D.C. (2019) Importance of the  $\beta$ 5- $\beta$ 6 Loop for the Structure, Catalytic Efficiency, and Stability of Carbapenem-Hydrolyzing Class D  $\beta$ -Lactamase Subfamily OXA-143. *Biochemistry*, **58**, 3604-3616.
44. Zhang, Y.-J., Wang, W.-M., Oelschlaeger, P., Chen, C., Lei, J.-E., Lv, M. and Yang, K.-W. (2018) Real-Time Monitoring of NDM-1 Activity in Live Bacterial Cells by Isothermal Titration Calorimetry: A New Approach To Measure Inhibition of Antibiotic-Resistant Bacteria. *ACS Infectious Diseases*, **4**, 1671-1678.
45. Wang, Q., He, Y., Lu, R., Wang, W.-M., Yang, K.-W., Fan, Hai M., Jin, Y. and Blackburn, G.M. (2018) Thermokinetic profile of NDM-1 and its inhibition by small carboxylic acids. *Bioscience Reports*, **38**.
46. Wang, W.-J., Wang, Q., Zhang, Y., Lu, R., Zhang, Y.-L., Yang, K.-W., Lei, J.-E. and He, Y. (2017) Characterization of  $\beta$ -lactamase activity using isothermal titration calorimetry. *Biochimica et Biophysica Acta (BBA) - General Subjects*, **1861**, 2031-2038.
47. Arai, S., Yonezawa, Y., Okazaki, N., Matsumoto, F., Shibasaki, C., Shimizu, R., Yamada, M., Adachi, M., Tamada, T., Kawamoto, M. *et al.* (2015) Structure of a highly acidic  $\beta$ -lactamase from the moderate halophile Chromohalobacter sp. 560 and the discovery of a Cs(+)-selective binding site. *Acta Crystallogr D Biol Crystallogr*, **71**, 541-554.
48. Mazzei, L., Cianci, M., Benini, S., Bertini, L., Musiani, F. and Ciurli, S. (2016) Kinetic and structural studies reveal a unique binding mode of sulfite to the nickel center in urease. *Journal of Inorganic Biochemistry*, **154**, 42-49.

49. Benini, S., Cianci, M., Mazzei, L. and Ciurli, S. (2014) Fluoride inhibition of *Sporosarcina pasteurii* urease: structure and thermodynamics. *JBIC Journal of Biological Inorganic Chemistry*, **19**, 1243-1261.
50. Kincaid, V.A., Sullivan, E.D., Klein, R.D., Noel, J.W., Rowlett, R.S. and Snider, M.J. (2012) Structure and Catalytic Mechanism of Nicotinate (Vitamin B3) Degradative Enzyme Maleamate Amidohydrolase from *Bordetella bronchiseptica* RB50. *Biochemistry*, **51**, 545-554.
51. Scortecchi, J.F., Serrão, V.H.B., Cheleski, J., Torini, J.R., Romanello, L., DeMarco, R. and D'Muniz Pereira, H. (2017) Spectroscopic and calorimetric s reveal dependence on dCTP and two metals ( $Zn^{2+}+Mg^{2+}$ ) for enzymatic activity of *Schistosoma mansoni* deoxycytidylate (dCMP) deaminase. *Biochimica et Biophysica Acta (BBA) - Proteins and Proteomics*, **1865**, 1326-1335.
52. Rohatgi, N., Gudmundsson, S. and Rolfsson, O. (2015) Kinetic analysis of gluconate phosphorylation by human gluconokinase using isothermal titration calorimetry. *FEBS Lett.*, **589**, 3548-3555.
53. Olsen, S.N. (2006) Applications of isothermal titration calorimetry to measure enzyme kinetics and activity in complex solutions. *Thermochim. Acta*, **448**, 12-18.
54. Bianconi, M.L. (2003) Calorimetric determination of thermodynamic parameters of reaction reveals different enthalpic compensations of the yeast hexokinase isozymes. *J. Biol. Chem.*, **278**, 18709-18713.
55. Todd, M.J. and Gomez, J. (2001) Enzyme kinetics determined using calorimetry: A general for enzyme activity? *Anal. Biochem.*, **296**, 179-187.
56. Bianconi, M.L. (2007) Calorimetry of enzyme-catalyzed reactions. *Biophys. Chem.*, **126**, 59-64.
57. Lopez-Zavala, A.A., Sotelo-Mundo, R.R., Hernandez-Flores, J.M., Lugo-Sanchez, M.E., Sugich-Miranda, R. and Garcia-Orozco, K.D. (2016) Arginine kinase shows nucleoside diphosphate kinase-like activity toward deoxythymidine diphosphate. *J. Bioenerg. Biomembr.*, **48**, 301-308.
58. Wang, Y., Guan, J., Di Trani, J.M., Auclair, K. and Mittermaier, A.K. (2019) Inhibition and Activation of Kinases by Reaction Products: A Reporter-Free . *Analytical Chemistry*, **91**, 11803-11811.
59. Streeter, J., Schickling, B.M., Jiang, S., Stanic, B., Thiel, W.H., Gakhar, L., Houtman, J.C.D. and Miller, F.J., Jr. (2014) Phosphorylation of Nox1 regulates association with NoxA1 activation domain. *Circ Res*, **115**, 911-918.
60. Lonhienne, T.G.A. and Winzor, D.J. (2002) Calorimetric Demonstration of the Potential of Molecular Crowding To Emulate the Effect of an Allosteric Activator on Pyruvate Kinase Kinetics. *Biochemistry*, **41**, 6897-6901.
61. Lonhienne, T.G.A., Reilly, P.E.B. and Winzor, D.J. (2003) Further evidence for the reliance of catalysis by rabbit muscle pyruvate kinase upon isomerization of the ternary complex between enzyme and products. *Biophysical Chemistry*, **104**, 189-198.
62. Palmer, A., Begres, B.N., Van Houten, J.M., Snider, M.J. and Fraga, D. (2013) Characterization of a putative oomycete taurocyamine kinase: Implications for the evolution of the phosphagen kinase family. *Comparative Biochemistry and Physiology Part B: Biochemistry and Molecular Biology*, **166**, 173-181.
63. Szabó, K., Kandra, L. and Gyémánt, G. (2019) Studies on the reversible enzyme reaction of rabbit muscle glycogen phosphorylase b using isothermal titration calorimetry. *Carbohydrate Research*, **477**, 58-65.
64. Méndez-Lorenzo, L., Porras-Domínguez, J.R., Raga-Carbajal, E., Olvera, C., Rodríguez-Alegría, M.E., Carrillo-Nava, E., Costas, M. and López Munguía, A. (2015) Intrinsic Levanase Activity of *Bacillus subtilis* 168 Levansucrase (SacB). *PLoS one*, **10**, e0143394-e0143394.

65. Ertan, H., Siddiqui, K.S., Muenchhoff, J., Charlton, T. and Cavicchioli, R. (2012) Kinetic and thermodynamic characterization of the functional properties of a hybrid versatile peroxidase using isothermal titration calorimetry: Insight into manganese peroxidase activation and lignin peroxidase inhibition. *Biochimie*, **94**, 1221-1231.
66. Siddiqui, K.S., Ertan, H., Charlton, T., Poljak, A., Daud Khaled, A.K., Yang, X., Marshall, G. and Cavicchioli, R. (2014) Versatile peroxidase degradation of humic substances: Use of isothermal titration calorimetry to assess kinetics, and applications to industrial wastes. *Journal of Biotechnology*, **178**, 1-11.
67. Henao-Escobar, W., Domínguez-Renedo, O., Alonso-Lomillo, M.A., Cascalheira, J., Dias-Cabral, A. and Arcos - Martínez, M. (2014) Characterization of a Disposable Electrochemical Biosensor Based on Putrescine Oxidase from *Micrococcus rubens* for the Determination of Putrescine. *Electroanalysis*, **27**.
68. Serrão, V.H.B., Romanello, L., Cassago, A., de Souza, J.R.T., Cheleski, J., DeMarco, R., Brandão-Neto, J. and Pereira, H.D.M. (2017) Structure and kinetics of recombinant *Schistosoma mansoni* dihydrofolate reductase. *Acta Tropica*, **170**, 190-196.
69. Catucci, G., Sadeghi, S.J. and Gilardi, G. (2019) A direct time-based ITC approach for substrate turnover measurements demonstrated on human FMO3. *Chemical Communications*, **55**, 6217-6220.
70. Pey, A.L. and Martinez, A. (2005) The activity of wild-type and mutant phenylalanine hydroxylase and its regulation by phenylalanine and tetrahydrobiopterin at physiological and pathological concentrations: An isothermal titration calorimetry study. *Molecular Genetics and Metabolism*, **86**, 43-53.
71. Cheleski, J., Wiggers, H.J., Citadini, A.P., da Costa Filho, A.J., Nonato, M.C. and Montanari, C.A. (2010) Kinetic mechanism and catalysis of *Trypanosoma cruzi* dihydroorotate dehydrogenase enzyme evaluated by isothermal titration calorimetry. *Analytical Biochemistry*, **399**, 13-22.
72. Romanello, L., Serrão, V.H.B., Torini, J.R., Bird, L.E., Nettleship, J.E., Rada, H., Reddivari, Y., Owens, R.J., DeMarco, R., Brandão-Neto, J. et al. (2017) Structural and kinetic analysis of *Schistosoma mansoni* Adenylosuccinate Lyase (SmADSL). *Molecular and Biochemical Parasitology*, **214**, 27-35.
73. Willemoës, M. and Sigurskjold, B.W. (2002) Steady-state kinetics of the glutaminase reaction of CTP synthase from *Lactococcus lactis*. *European Journal of Biochemistry*, **269**, 4772-4779.
